# Supplementary material for: Enantioselective self-assembly of chiral calix[4]arene acid with amines
Source: Royal Society of Chemistry journal article supplement (doi:10.1039/b817974c), 2009-01-01
Supplement: b817974c.pdf [file b817974c.pdf]

## Supplementary Information

### Enantioselective Self-Assembly of Chiral Calix[4]arene Acid with Amines

Yan-Song Zheng,<sup>\*,†</sup> Shu-Yun Ran,<sup>†</sup> Yu-Jin Hu,<sup>†</sup> and Xian-Xian Liu<sup>‡</sup>

<sup>†</sup> Department of Chemistry, Huazhong University of Science and Technology, Wuhan 430074, P. R. China, and

<sup>‡</sup> Department of Chemistry, Guilin Normal College, Guilin, Guangxi 541001, P. R. China

[zyansong@hotmail.com](mailto:zyansong@hotmail.com)

### Table of Contents

|                                                                                                                  |    |
|------------------------------------------------------------------------------------------------------------------|----|
| Materials and Methods.....                                                                                       | 02 |
| Supporting References.....                                                                                       | 03 |
| Synthesis of Calix[4]arene acid <b>4</b> .....                                                                   | 03 |
| Supporting Figures.....                                                                                          | 04 |
| <b>Figure S1.</b> <sup>1</sup> H NMR spectrum of calix[4]arene acid <b>4</b> in CDCl <sub>3</sub> .....          | 04 |
| <b>Figure S2.</b> <sup>13</sup> C NMR spectrum of calix[4]arene acid <b>4</b> in CDCl <sub>3</sub> .....         | 04 |
| <b>Figure S3.</b> IR spectrum of calix[4]arene acid <b>4</b> .....                                               | 05 |
| <b>Figure S4.</b> Gel from mixing of calix[4]arene <b>4</b> and amine ( <i>R</i> )- <b>5</b> .....               | 05 |
| <b>Figure S5.</b> XRD pattern of powder solid .....                                                              | 06 |
| <b>Figure S6.</b> FE-SEM images of gel from interaction of <b>4</b> with ( <i>R</i> )- <b>5</b> .....            | 06 |
| <b>Figure S7.</b> FE-SEM images of gel from interaction of <b>4</b> with ( <i>S</i> )- <b>6</b> .....            | 07 |
| <b>Figure S8.</b> FE-SEM images of suspension from interaction of <b>4</b> with ( <i>1S,2S</i> )- <b>8</b> ..... | 08 |
| <b>Figure S9.</b> FE-SEM images of suspension from interaction of <b>4</b> with ( <i>1S,2S</i> )- <b>8</b> ..... | 09 |
| <b>Figure S10.</b> TEM images of suspension from interaction of <b>4</b> with ( <i>1R,2S</i> )- <b>7</b> .....   | 10 |
| <b>Figure S11.</b> TEM images of suspension from interaction of <b>4</b> with ( <i>1S,2S</i> )- <b>8</b> .....   | 11 |
| <b>Figure S12.</b> TEM images of gel from interaction of <b>4</b> with ( <i>1S,2S</i> )- <b>8</b> .....          | 12 |
| <b>Figure S13.</b> TEM images of gel from interaction of <b>4</b> with ( <i>1S,2S</i> )- <b>8</b> .....          | 13 |
| <b>Figure S14.</b> Emission spectra of <b>4</b> (1.0×10 <sup>-4</sup> M) in ethanol .....                        | 14 |
| <b>Figure S15.</b> Changes of fluorescence intensity of <b>4</b> on its concentration .....                      | 14 |
| <b>Figure S16.</b> Emission spectra of <b>4</b> on addition of ( <i>R</i> )- <b>5</b> .....                      | 15 |
| <b>Figure S17.</b> Job plot for ( <i>R</i> )- <b>5</b> .....                                                     | 15 |
| <b>Figure S18.</b> Determination of association constant for ( <i>R</i> )- <b>5</b> by nonlinear fitting .....   | 16 |
| <b>Figure S19.</b> Emission spectra of <b>4</b> on addition of ( <i>S</i> )- <b>5</b> .....                      | 16 |
| <b>Figure S20.</b> Job plot for ( <i>S</i> )- <b>5</b> .....                                                     | 17 |
| <b>Figure S21.</b> Determination of association constant for ( <i>S</i> )- <b>5</b> by nonlinear fitting .....   | 17 |

|                                                                                                                    |           |
|--------------------------------------------------------------------------------------------------------------------|-----------|
| <b>Figure S22.</b> Emission spectra of <b>4</b> on addition of ( <i>R</i> )- <b>6</b> .....                        | <b>18</b> |
| <b>Figure S23.</b> Job plot for ( <i>R</i> )- <b>6</b> .....                                                       | <b>18</b> |
| <b>Figure S24.</b> Determination of association constant for ( <i>R</i> )- <b>6</b> by nonlinear fitting .....     | <b>19</b> |
| <b>Figure S25.</b> Emission spectra of <b>4</b> on addition of ( <i>S</i> )- <b>6</b> .....                        | <b>19</b> |
| <b>Figure S26.</b> Job plot for ( <i>S</i> )- <b>6</b> .....                                                       | <b>20</b> |
| <b>Figure S27.</b> Determination of association constant for ( <i>S</i> )- <b>6</b> by nonlinear fitting .....     | <b>20</b> |
| <b>Figure S28.</b> Emission spectra of <b>4</b> on addition of ( <i>1S,2R</i> )- <b>7</b> .....                    | <b>21</b> |
| <b>Figure S29.</b> Job plot for ( <i>1S,2R</i> )- <b>7</b> .....                                                   | <b>21</b> |
| <b>Figure S30.</b> Determination of association constant for ( <i>1S,2R</i> )- <b>7</b> by nonlinear fitting ..... | <b>22</b> |
| <b>Figure S31.</b> Emission spectra of <b>4</b> on addition of ( <i>1R,2S</i> )- <b>7</b> .....                    | <b>22</b> |
| <b>Figure S32.</b> Job plot for ( <i>1R,2S</i> )- <b>7</b> .....                                                   | <b>23</b> |
| <b>Figure S33.</b> Determination of association constant for ( <i>1R,2S</i> )- <b>7</b> by nonlinear fitting ..... | <b>23</b> |
| <b>Figure S34.</b> Emission spectra of <b>4</b> on addition of ( <i>1R,2R</i> )- <b>8</b> .....                    | <b>24</b> |
| <b>Figure S35.</b> Job plot for ( <i>1R,2R</i> )- <b>8</b> .....                                                   | <b>24</b> |
| <b>Figure S36.</b> Determination of association constant for ( <i>1R,2R</i> )- <b>8</b> by nonlinear fitting ..... | <b>25</b> |
| <b>Figure S37.</b> Emission spectra of <b>4</b> on addition of ( <i>1S,2S</i> )- <b>8</b> .....                    | <b>25</b> |
| <b>Figure S38.</b> Job plot for ( <i>1S,2S</i> )- <b>8</b> .....                                                   | <b>26</b> |
| <b>Figure S39.</b> Determination of association constant for ( <i>1S,2S</i> )- <b>8</b> by nonlinear fitting ...   | <b>26</b> |

## Materials and Methods

**Materials.** All reagents and solvents were chemical pure (CP) grade or analytical reagent (AR) grade and were used as received. *L*-2,3-dibenzoyltartaric anhydride was homemade by the reaction of *L*-2,3-dibenzoyltartaric acid and benzoyl chloride. *p*-*tert*-Butylcalix[4]arene and calix[4]arene starting materials were prepared according to supporting reference (S1) and (S2) respectively.

**Measurements.** <sup>1</sup>H NMR and <sup>13</sup>C NMR spectra were measured on a Bruker AV 400 spectrometer at 298 K in CDCl<sub>3</sub>. Field emission scanning electron microscopy (FE-SEM) images were taken on a FEI Sirion200 electron microscope operating at 5 kV or 10 kV. The sample was prepared by casting the gel onto a glass slide and let it air dry. Transmission electron micrographs (TEM) were recorded on a FEI Technai G2 20 electron microscope at 200 kV. The gel or suspension was diluted 4 times with corresponding solvent, and then was dropped onto a copper grid covered with a thin carbon film on a filter paper and air dried. Infrared spectra were recorded on BRUKER EQUINAX55 spectrometer. Absorption spectra were recorded on a Hewlett Packard 8453 UV–Vis spectrophotometer. Fluorescent emission spectra were collected on Shimadzu RF-5301 at 298 K.

Fluorescence titration was carried out by addition of concentrated solution of chiral amine into the solution of calixarene **4** in ethanol. To keep constant concentration of calixarene **4** and account for dilution effects during titration, the solution of chiral amine was prepared with the solution of calixarene **4** at its initial concentration as a solvent.

Powder X-ray diffraction (XRD) pattern were measured on a  $\chi$ 'Pert PRO diffraction instrument. The scan parameters and peak list are as following:

### Anchor Scan Parameters

|                                          |                                                |
|------------------------------------------|------------------------------------------------|
| Dataset Name:                            | A-4                                            |
| File name:                               | E:\X'Pert Data\zhengyansong\20080710\A-4.xrdml |
| Comment:                                 | 0.5-5 degree                                   |
| Measurement Date / Time:                 | 7/10/2008 4:53:43 PM                           |
| Operator:                                | dell                                           |
| Raw Data Origin:                         | XRD measurement (*.XRDML)                      |
| Scan Axis:                               | Gonio                                          |
| Start Position [ $^{\circ}$ 2Th.]:       | 1.0084                                         |
| End Position [ $^{\circ}$ 2Th.]:         | 9.9674                                         |
| Step Size [ $^{\circ}$ 2Th.]:            | 0.0170                                         |
| Scan Step Time [s]:                      | 60.6901                                        |
| Scan Type:                               | Continuous                                     |
| PSD Mode:                                | Scanning                                       |
| PSD Length [ $^{\circ}$ 2Th.]:           | 2.12                                           |
| Offset [ $^{\circ}$ 2Th.]:               | 0.0000                                         |
| Divergence Slit Type:                    | Fixed                                          |
| Divergence Slit Size [ $^{\circ}$ ]:     | 0.0315                                         |
| Specimen Length [mm]:                    | 10.00                                          |
| Measurement Temperature [ $^{\circ}$ C]: | 25.00                                          |

|                                |              |
|--------------------------------|--------------|
| Anode Material:                | Cu           |
| K-Alpha1 [Å]:                  | 1.54060      |
| K-Alpha2 [Å]:                  | 1.54443      |
| K-Beta [Å]:                    | 1.39225      |
| K-A2 / K-A1 Ratio:             | 0.50000      |
| Generator Settings:            | 40 mA, 40 kV |
| Goniometer Radius [mm]:        | 240.00       |
| Dist. Focus-Diverg. Slit [mm]: | 91.00        |
| Incident Beam Monochromator:   | No           |
| Spinning:                      | No           |

#### Peak List

| Pos. [°2Th.] | Height [cts] | FWHM [°2Th.] | d-spacing [Å] | Rel. Int. [%] |
|--------------|--------------|--------------|---------------|---------------|
| 2.9988       | 26.54        | 0.5353       | 29.46237      | 11.44         |
| 5.3265       | 148.71       | 0.4684       | 16.59156      | 64.10         |
| 6.2854       | 232.00       | 0.1338       | 14.06228      | 100.00        |

#### Synthesis of calix[4]arene acid **4**.

To a flask calix[4]arene **3** (0.79 g, 1.0 mmol), *L*-2,3-dibenzoyltartaric anhydride (0.78 g, 2.29 mmol) and dry THF (25 mL) were added. The mixture was stirred for about 24 h at room temperature until **3** was disappeared. The solvent was removed by rotary vaporization under reduced pressure, and the residue was recrystallized from methanol and water to afford **4** as white powders (1.05g, 93%). Mp 186–188 °C;  $[\alpha]_D^{20} -0.377$  (*c* 1.0, CHCl<sub>3</sub>); IR (KBr)  $\nu$  3306, 3041, 2959, 2869, 1732, 1603, 1483 cm<sup>-1</sup>. <sup>1</sup>H NMR (400 MHz, CDCl<sub>3</sub>)  $\delta$  11.64 (s, 2H, PhCOCHCONH), 9.45 (s, 2H, OCH<sub>2</sub>CONH), 8.11–8.05 (m, 8H, OOCArH), 7.90 (s, 2H, ArOH), 7.53–7.32 (m, 12H, OOCArH), 7.02, 6.97 (2×d, *J* = 2 Hz, 4H, ArCH<sub>2</sub>ArH), 6.95, 6.88 (2×d, *J* = 2.5 Hz, 4H, ArCH<sub>2</sub>ArH), 6.01, 5.86 (2×d, *J* = 6.2 Hz, 4H, ArCOOCH), 5.02, 4.37 (2×d, *J* = 15 Hz, 4H, ArOCH<sub>2</sub>CONH), 4.25 (d, *J* = 13.2 Hz, 2H, ArCH<sub>2</sub>Ar), 4.07 (d, *J* = 13.6 Hz, 2H, ArCH<sub>2</sub>Ar), 3.37 (d, *J* = 13.6 Hz, 2H, ArCH<sub>2</sub>Ar), 3.32 (d, *J* = 13.2 Hz, 2H, ArCH<sub>2</sub>Ar), 1.09 (s, 18H, C(CH<sub>3</sub>)<sub>3</sub>), 1.04 (s, 18H, C(CH<sub>3</sub>)<sub>3</sub>); <sup>13</sup>C NMR (100 MHz, CDCl<sub>3</sub>)  $\delta$  169.0, 168.1, 165.7, 165.5, 163.3, 149.2, 148.9, 148.3, 142.7, 133.8, 133.4, 132.6, 132.4, 130.3, 130.1, 128.6, 128.4, 128.3, 128.2, 127.2, 126.8, 126.3, 125.8, 125.5, 125.3, 74.1, 71.8, 71.7, 34.1, 33.8, 31.6, 30.9. Anal. Calcd for for C<sub>84</sub>H<sub>88</sub>N<sub>4</sub>O<sub>20</sub>: C, 68.45; H, 6.03; N, 3.80. Found: C, 68.32; H, 6.08; N, 3.74.

#### Supporting References

- S1. C. D. Gutsche, M. Iqbal, D. Stewart, *J. Org. Chem.* **51**, 742 (1986).  
S2. C. D. Gutsche, L. G. Lin, *Tetrahedron* **42**, 1633 (1986).

## Supporting Figures

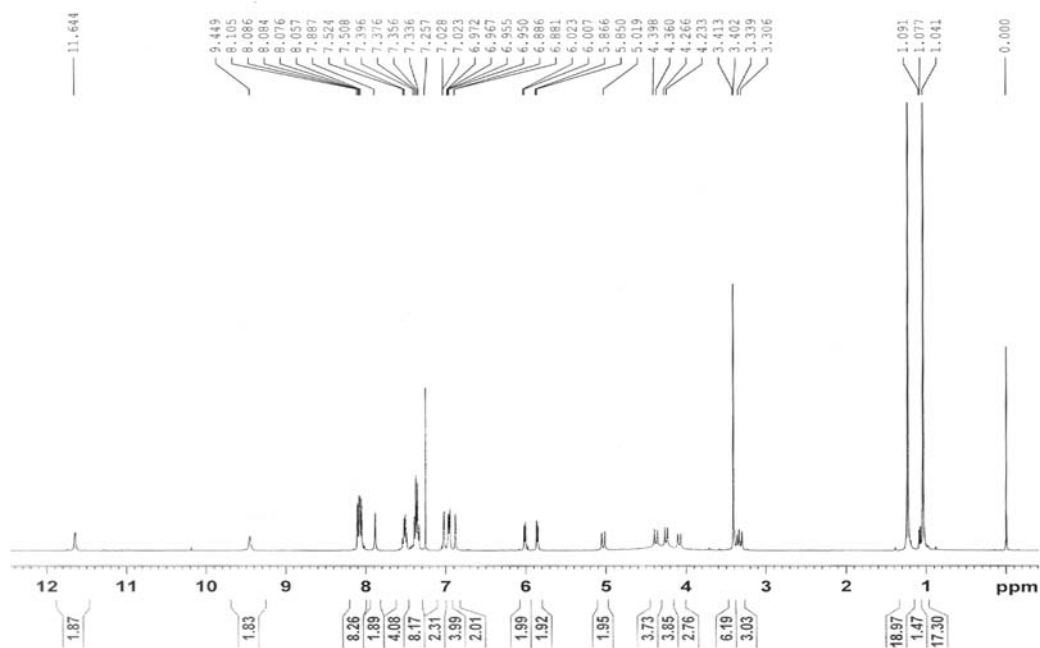

**Figure S1.**  $^1\text{H}$  NMR spectrum of calix[4]arene acid **4** in  $\text{CDCl}_3$ . The high peak at 3.41 ppm is from 1,2-dichloroethane.

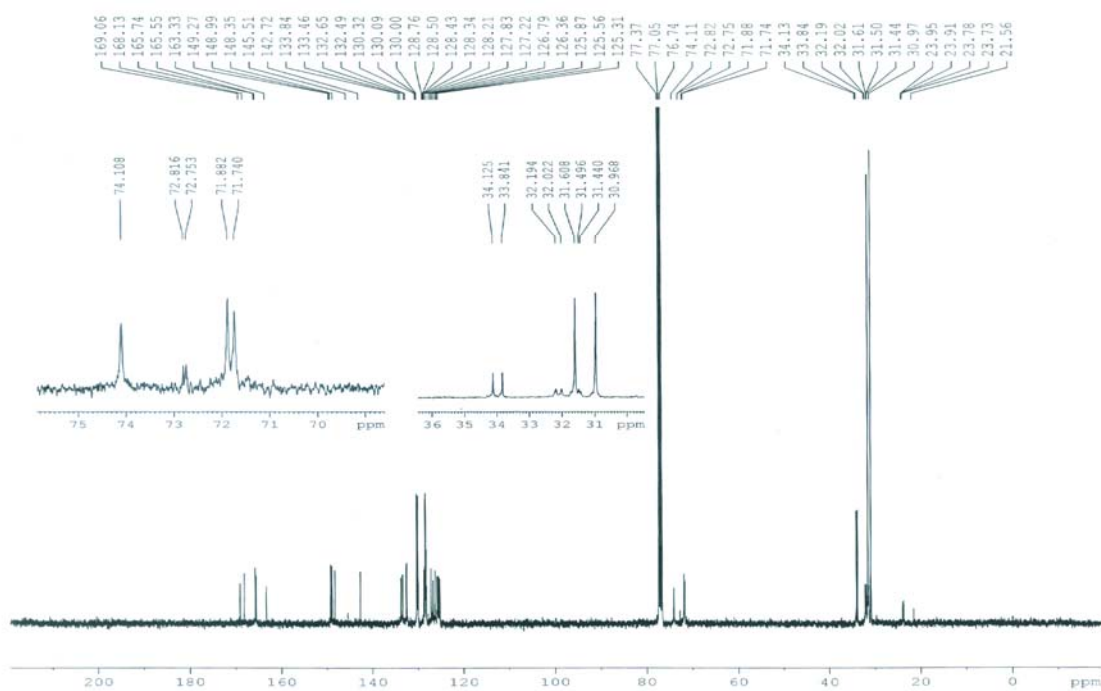

**Figure S2.**  $^{13}\text{C}$  NMR spectrum of calix[4]arene acid **4** in  $\text{CDCl}_3$ .

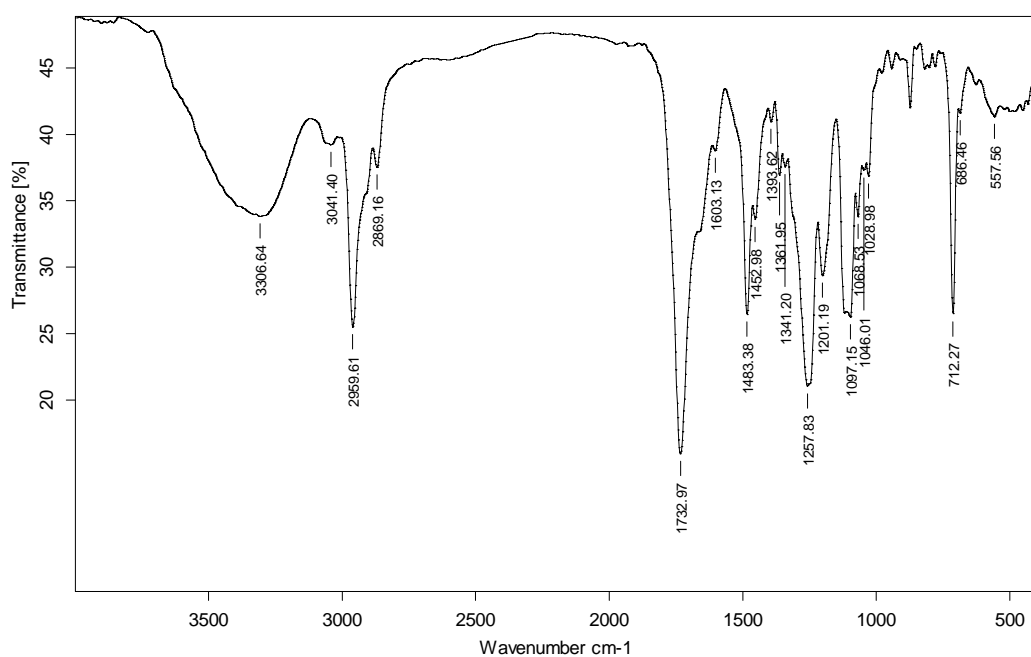

**Figure S3.** IR spectrum of calix[4]arene acid **4**.

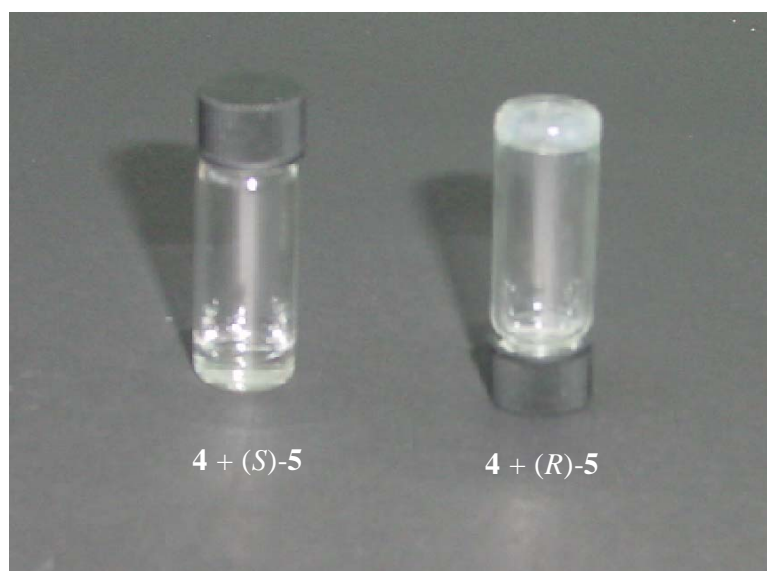

**Figure S4.** Gel from mixing of calix[4]arene **4** and amine (*R*)-**5** (right) in 1,2-dichloroethane, and clear solution from mixing of calix[4]arene **4** and amine (*S*)-**5** (left) in 1,2-dichloroethane.

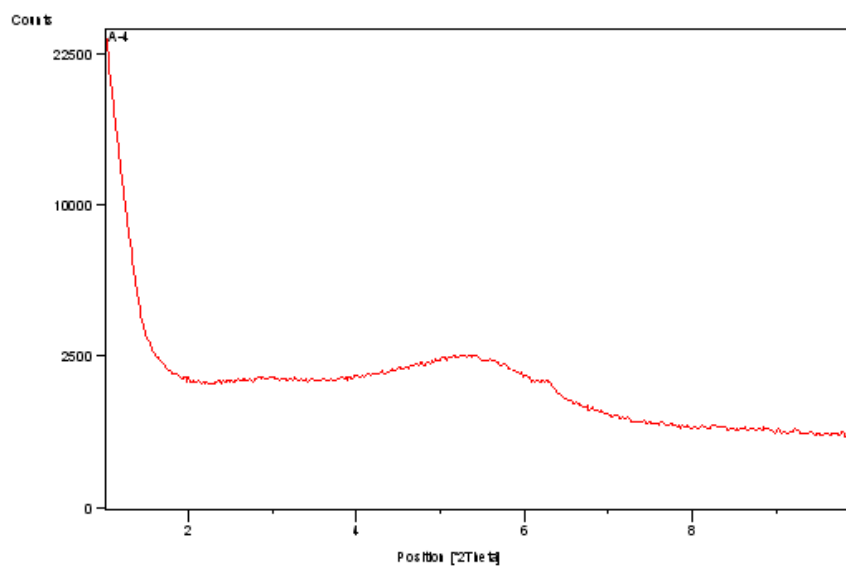

**Figure S5.** XRD pattern of powder solid dried from suspension of **4** and (*1S,2S*)-**8** in cyclohexane and 1,2-dichloroethane (20:1).

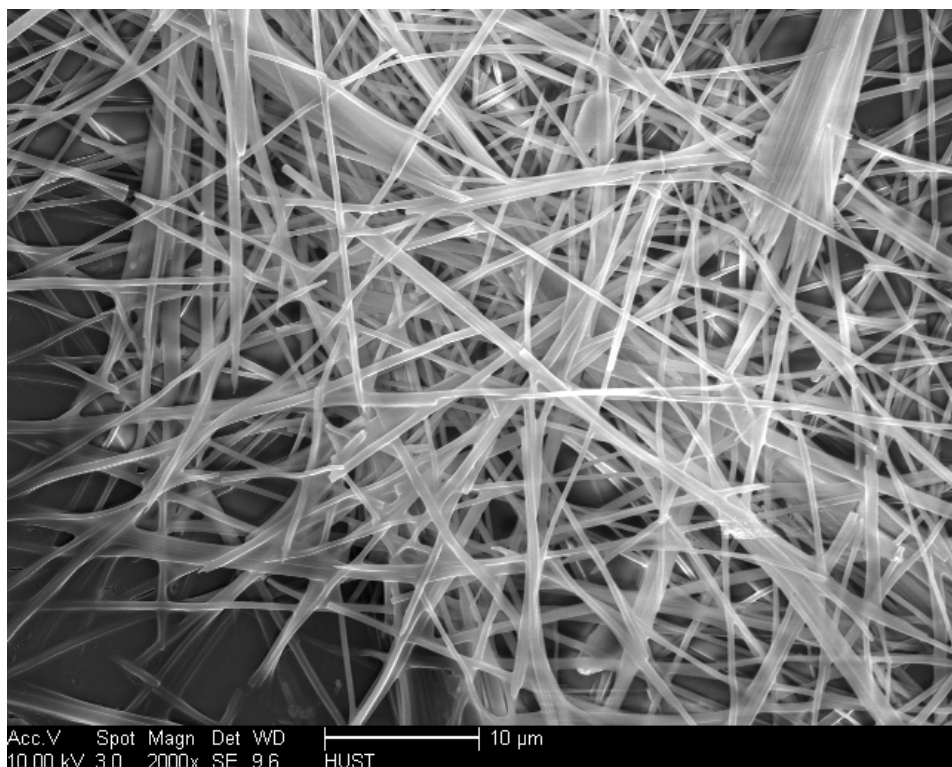

**Figure S6.** FE-SEM images of gel from interaction of **4** (10mM) with (*R*)-**5** (20mM) in 1,2-dichloroethane.

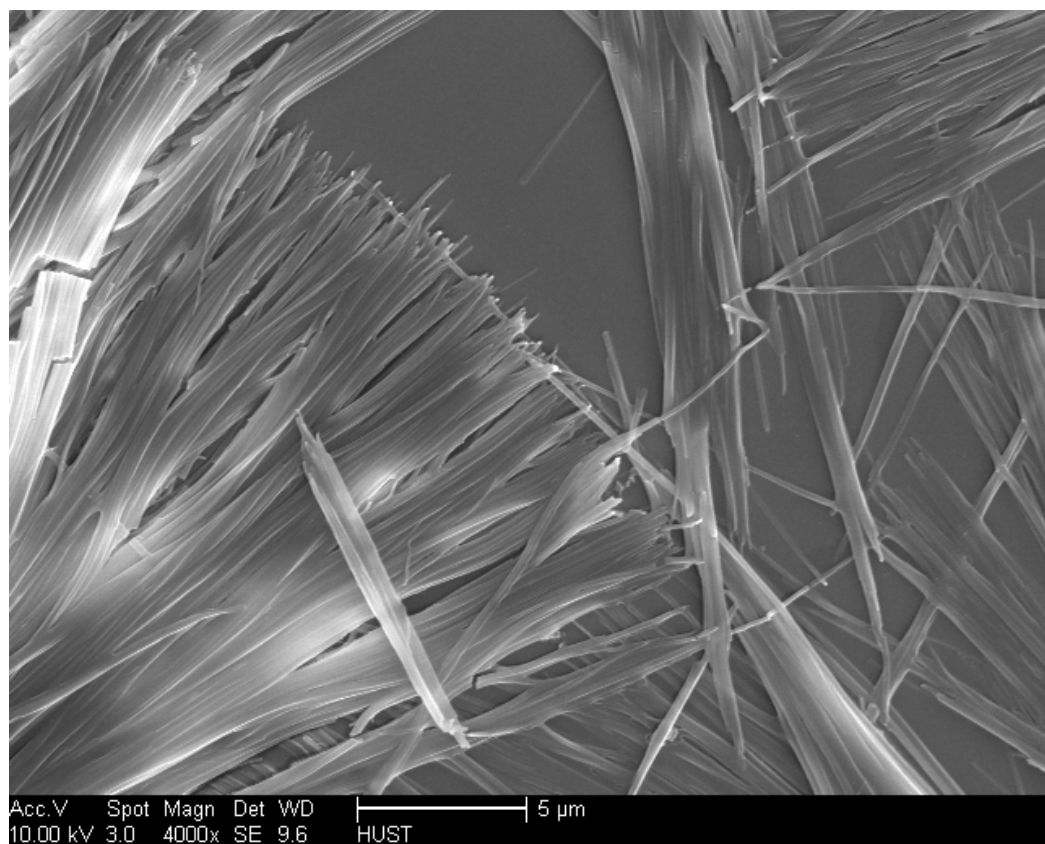

**Figure S7.** FE-SEM images of gel from interaction of **4** (10mM) with (*S*)-**6** (20mM) in cyclohexane and 1,2-dichloroethane of volume ratio 1:2.



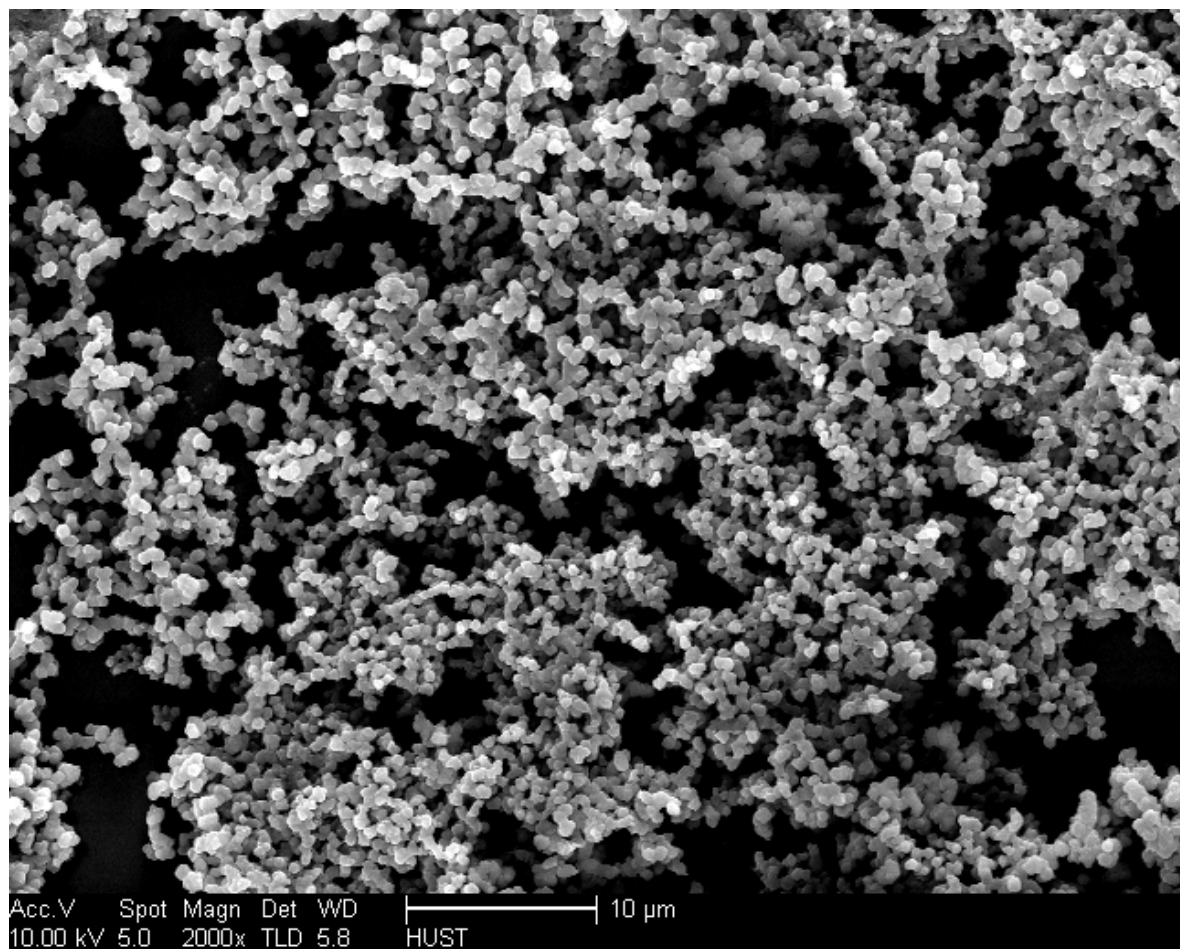

**Figure S8.** FE-SEM images of suspension from interaction of **4** (10mM) with (*1S,2S*)-**8** (20mM) in cyclohexane and 1,2-dichloroethane of volume ratio 20:1.

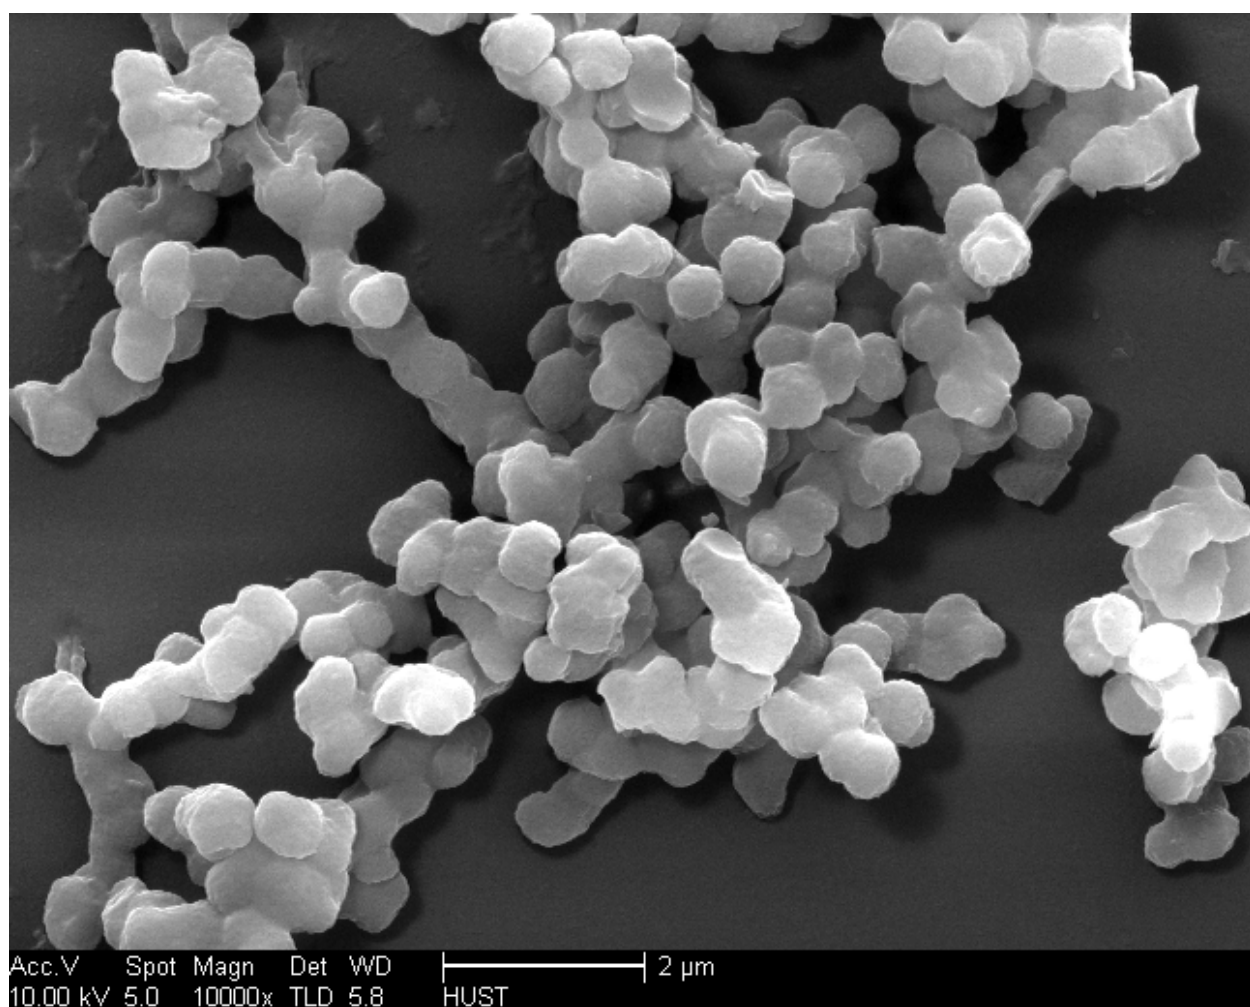

**Figure S9.** FE-SEM images of suspension from interaction of **4** (10mM) with (*1S,2S*)-**8** (20mM) in cyclohexane and 1,2-dichloroethane of volume ratio 20:1.

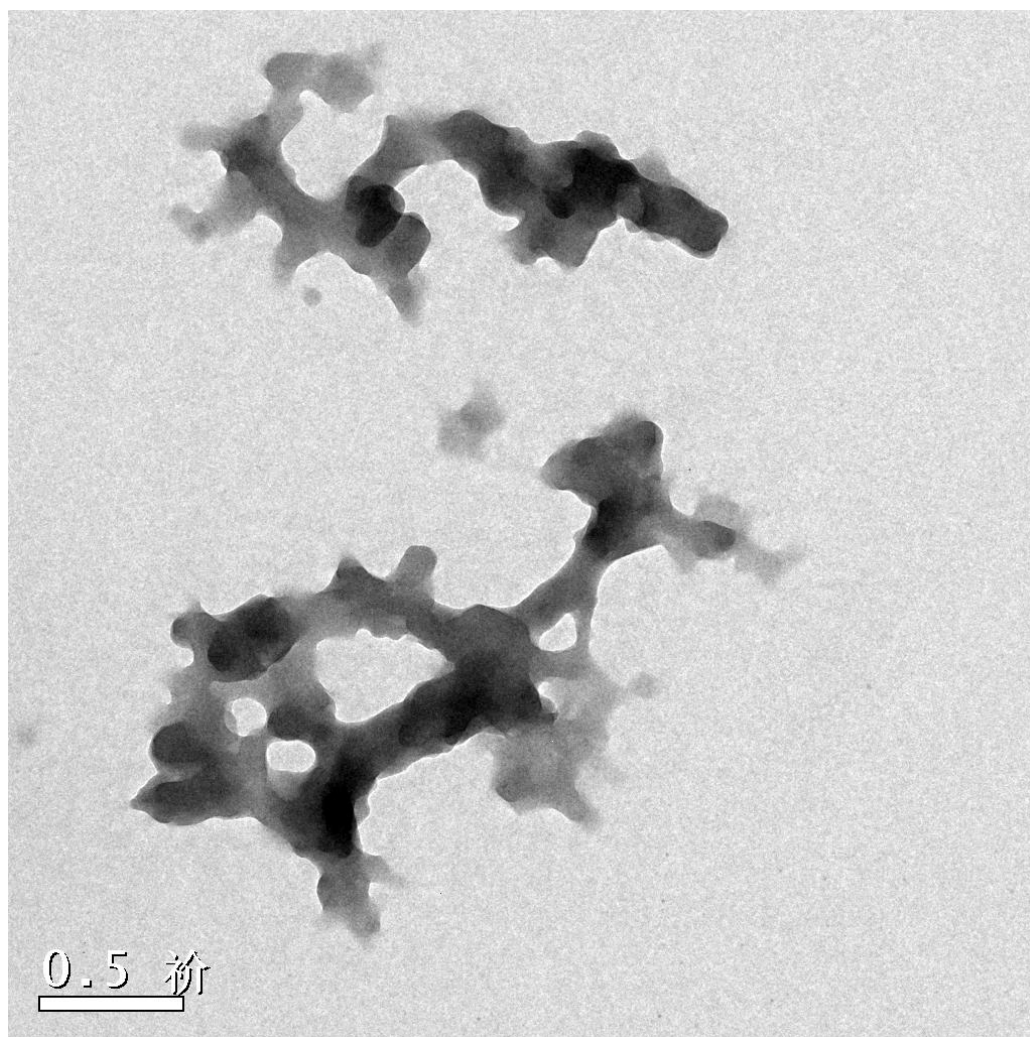

**Figure S10.** TEM images of suspension from interaction of **4** (10mM) with (*1R,2S*)-**7** (20mM) in cyclohexane and 1,2-dichloroethane of volume ratio 7:1.

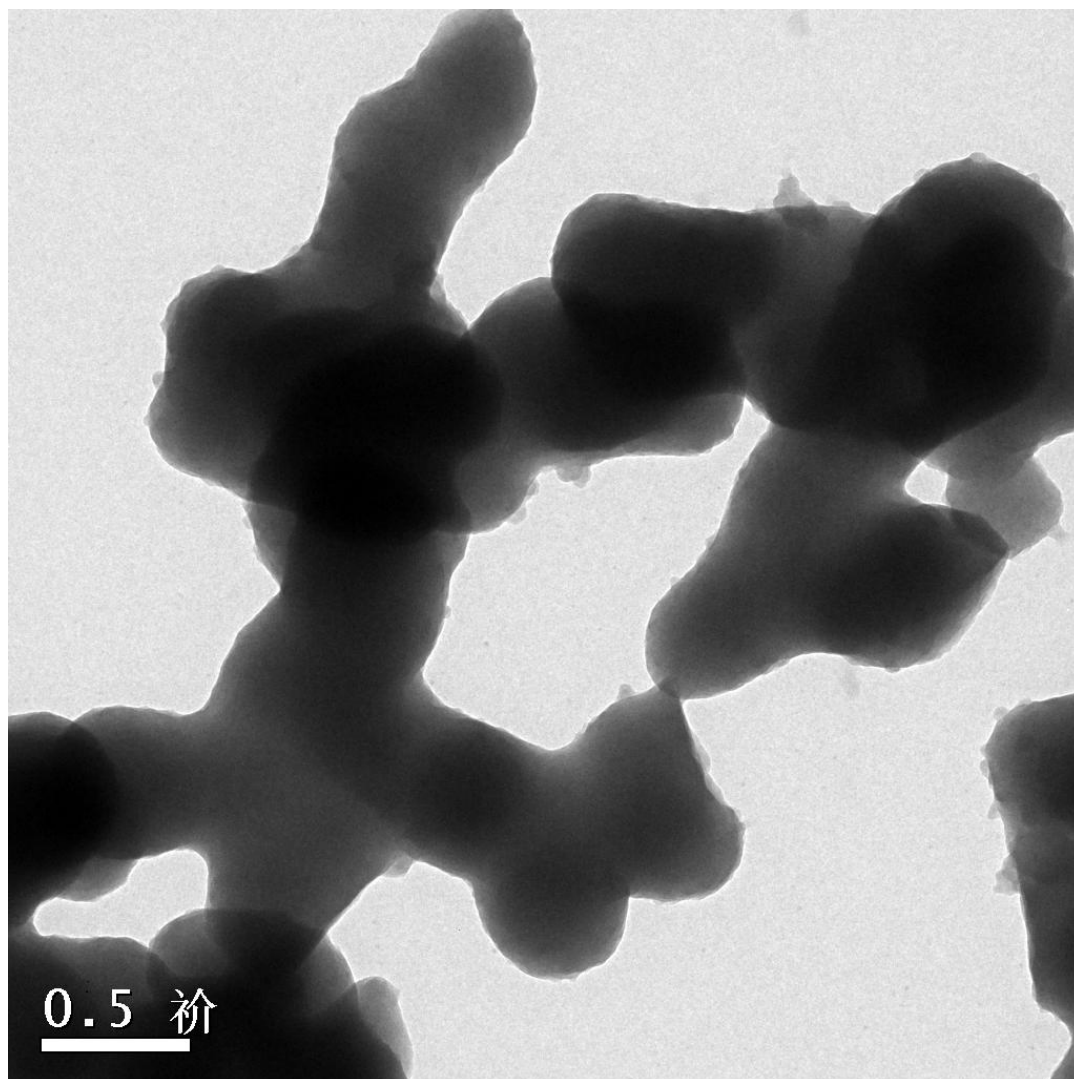

**Figure S11.** TEM images of suspension from interaction of **4** (10mM) with (*1S,2S*)-**8** (20mM) in cyclohexane and 1,2-dichloroethane of volume ratio 20:1.

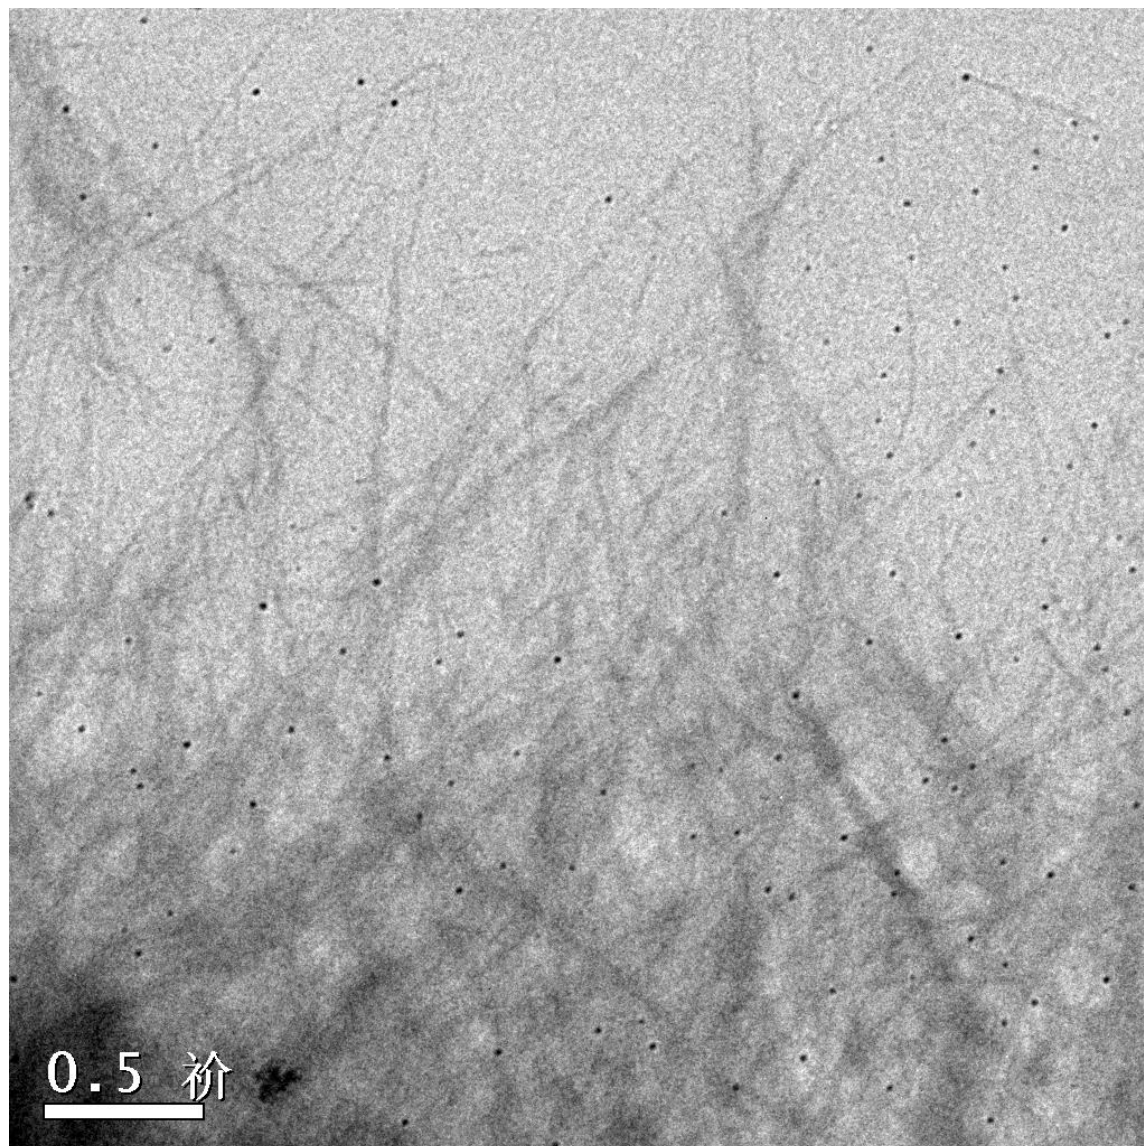

**Figure S12.** TEM images of gel from interaction of **4** (10mM) with (*1S,2S*)-**8** (20mM) in cyclohexane and 1,2-dichloroethane of volume ratio 20:1.

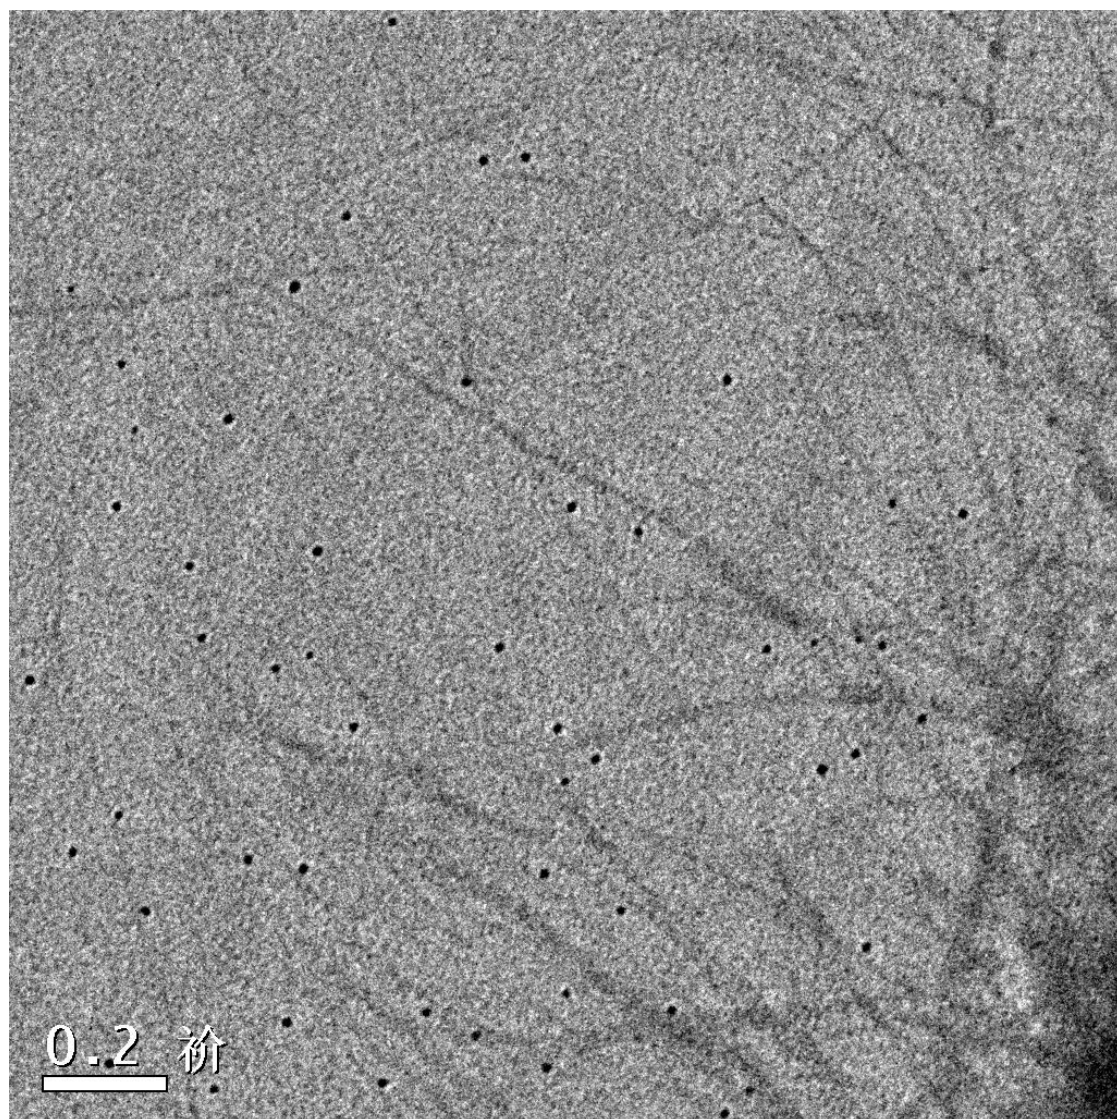

**Figure S13.** TEM images of gel from interaction of **4** (10mM) with (*1S,2S*)-**8** (20mM) in cyclohexane and 1,2-dichloroethane of volume ratio 20:1.

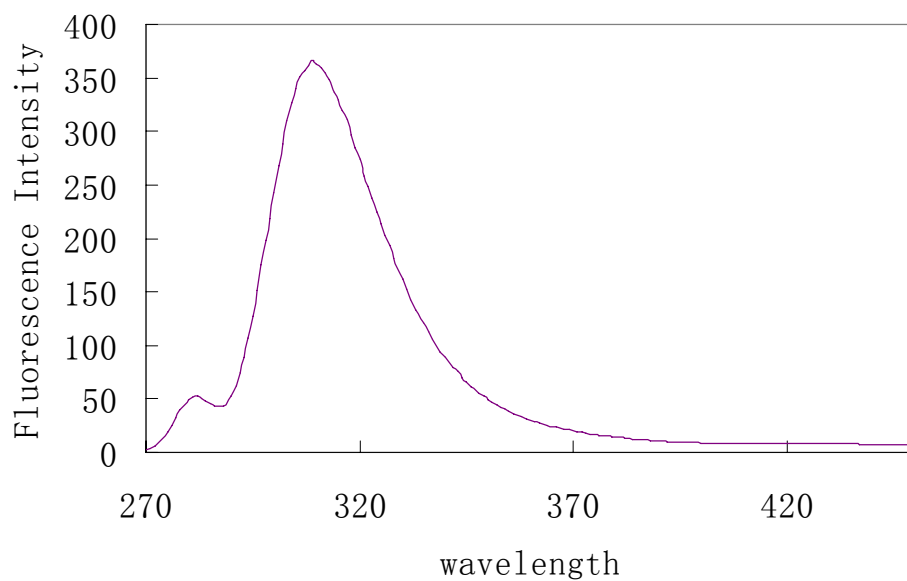

**Figure S14.** Emission spectra of **4** ( $1.0 \times 10^{-4}$  M) in ethanol,  $\lambda_{\text{em}} = 280$  nm, slit width: Ex 5 nm; Em 10 nm.

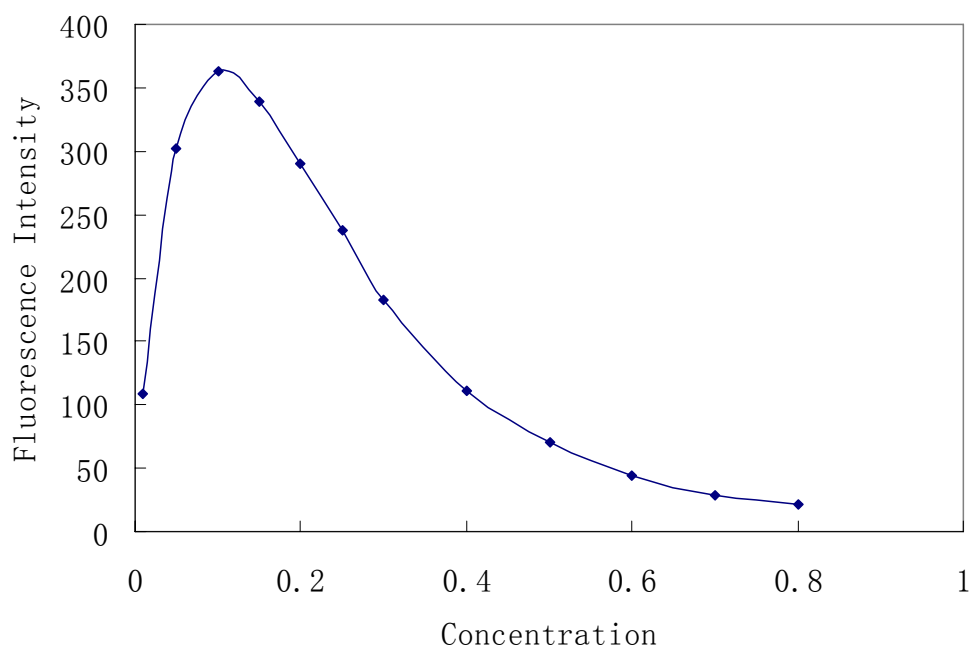

**Figure S15.** Changes of fluorescence intensity of **4** on its concentration ( $c \times 10^3$  Mol/L).

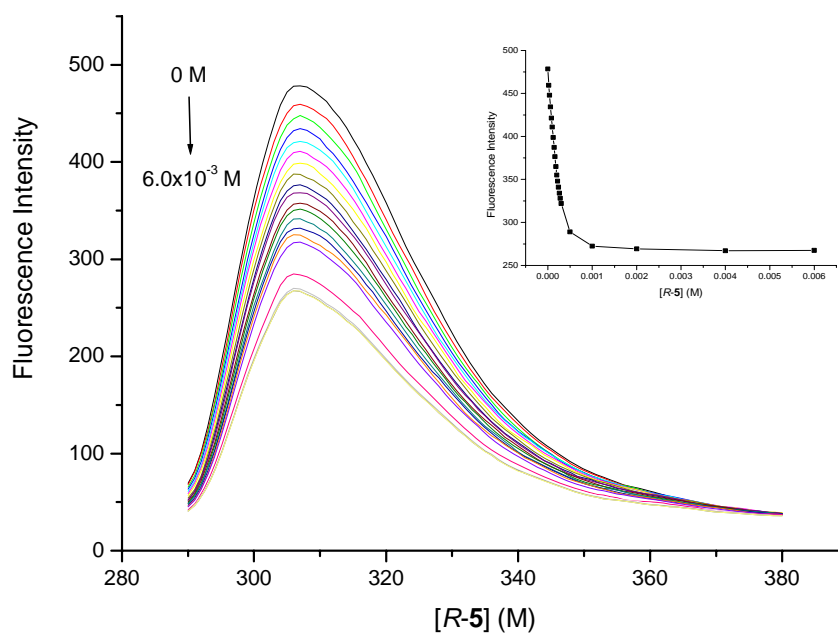

**Figure S16.** Emission spectra of **4** ( $1.0 \times 10^{-4}$  M) on addition of (*R*)-**5** ( $0$ – $6.0 \times 10^{-3}$  M) in ethanol,  $\lambda_{\text{ex}} = 280$  nm, slit width: Ex 5 nm; Em 5 nm. Inset: changes of fluorescence intensity at  $\lambda_{\text{max}}$  of **4** with molar concentration of (*R*)-**5**.

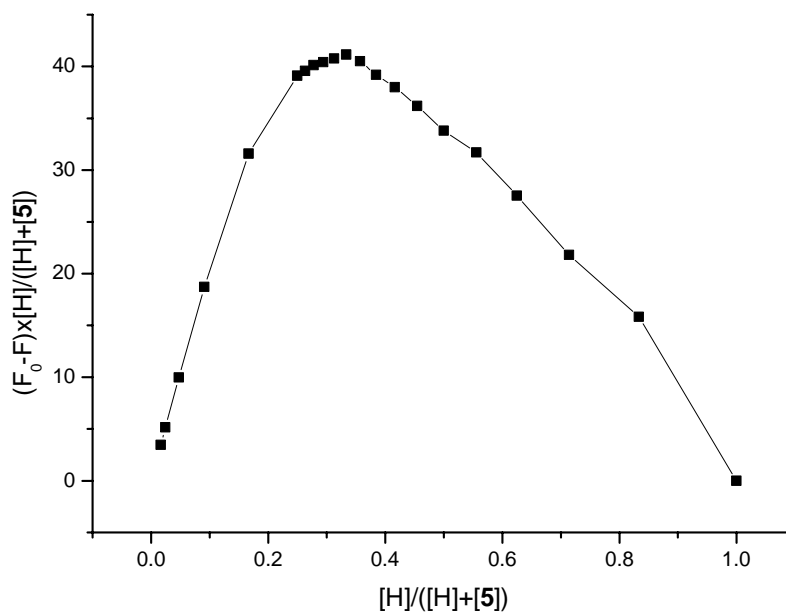

**Figure S17.** Job plot for fluorescence titration of **4** with *R*-**5**.



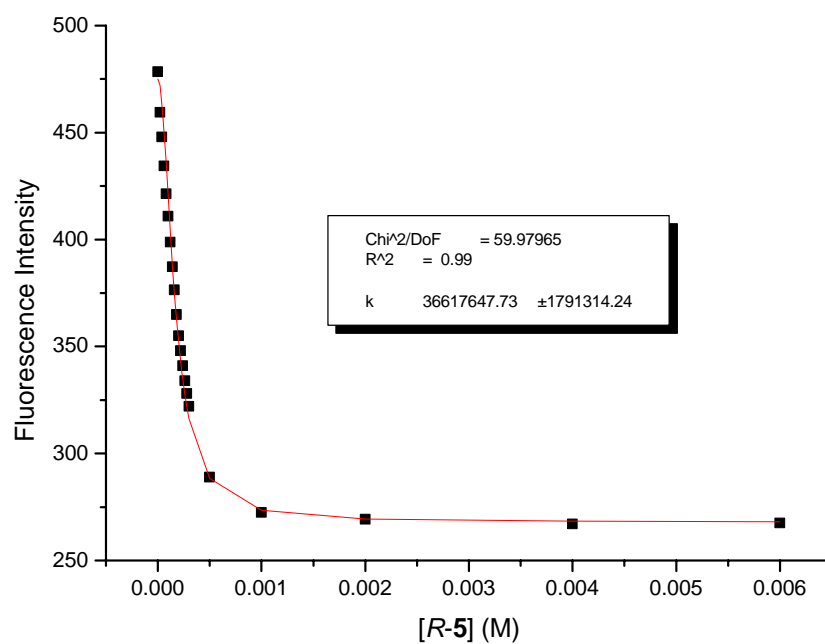

**Figure S18.** Determination of association constant by nonlinear fitting in Origin 6.1. The black squares are values by measurement and the red curve is one by fitting.

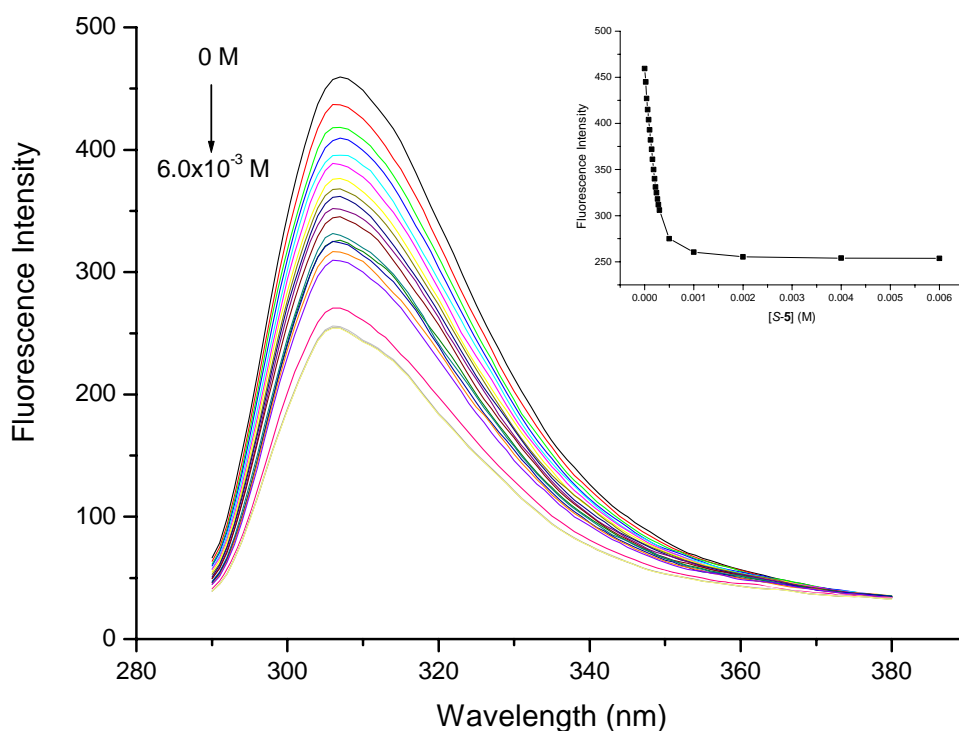

**Figure S19.** Emission spectra of **4** ( $1.0 \times 10^{-4}$  M) on addition of (*S*)-**5** ( $0-6.0 \times 10^{-3}$  M) in ethanol,  $\lambda_{ex} = 280$  nm, slit width: Ex 5 nm; Em 5 nm. Inset: changes of fluorescence intensity at  $\lambda_{max}$  of **4** with molar concentration of (*S*)-**5**.

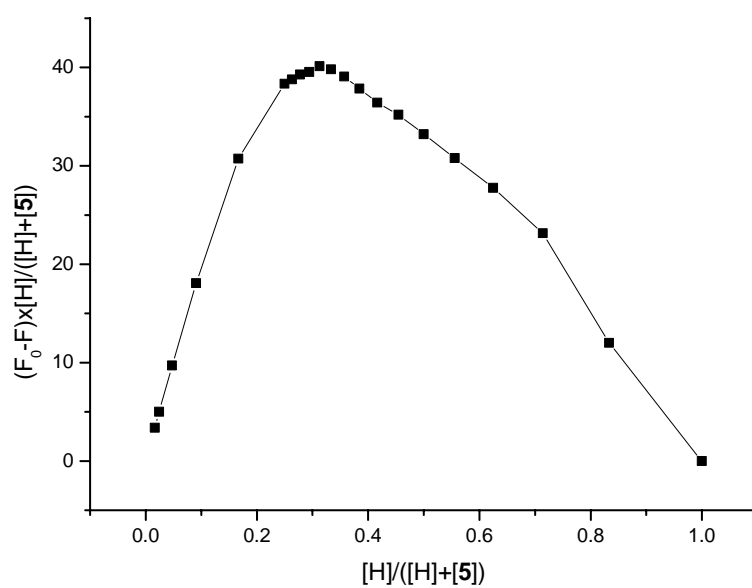

**Figure S20.** Job plot for fluorescence titration of **4** with **S-5**.

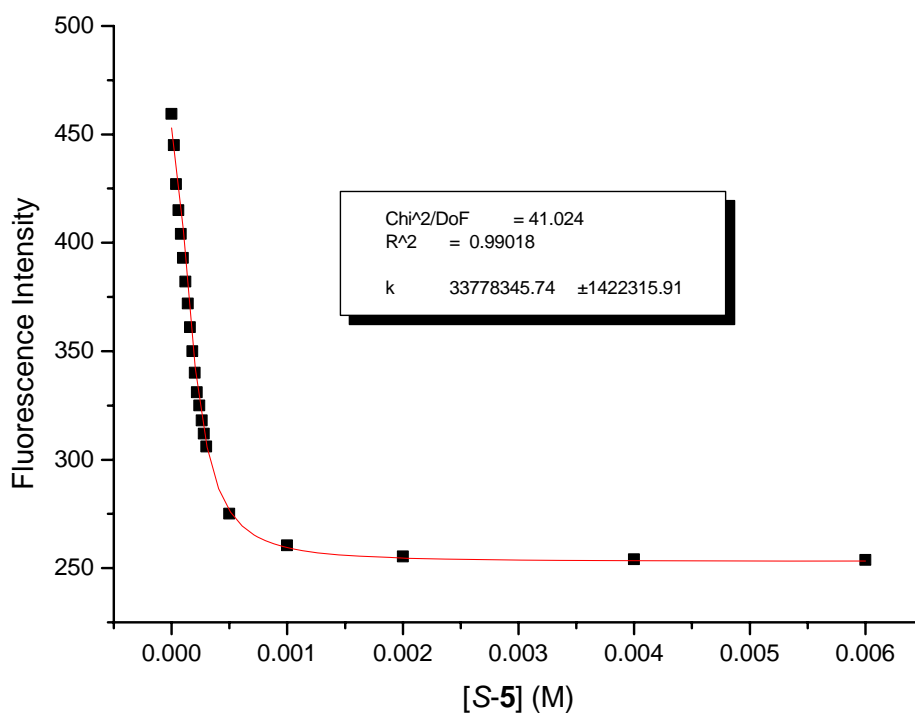

**Figure S21.** Determination of association constant by nonlinear fitting in Origin 6.1. The black squares are values by measurement and the red curve is one by fitting.

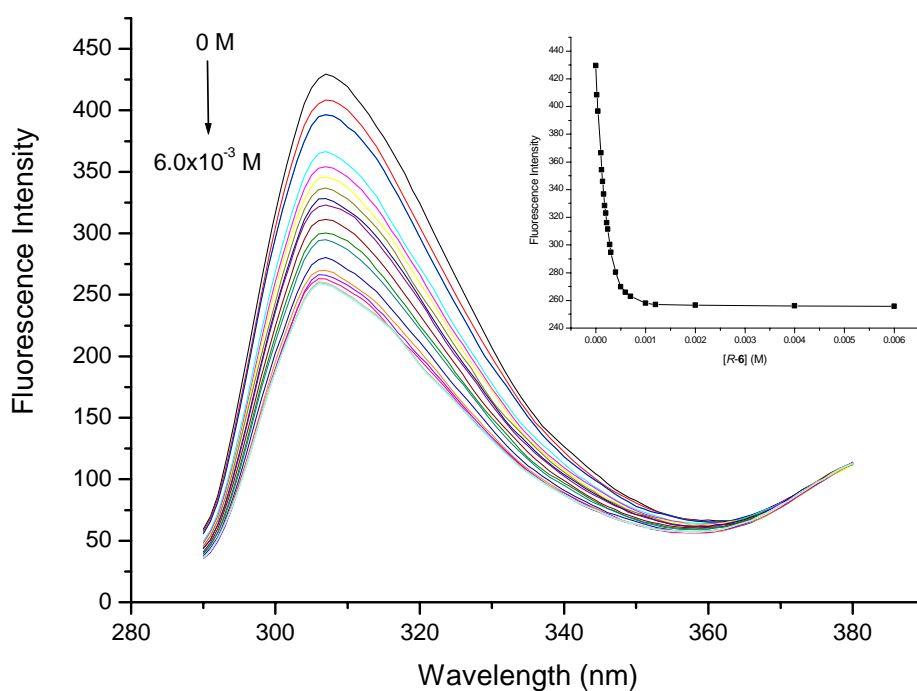

**Figure S22.** Emission spectra of **4** ( $1.0 \times 10^{-4}$  M) on addition of *(R)*-**6** (0– $6.0 \times 10^{-3}$  M) in ethanol,  $\lambda_{\text{ex}} = 280$  nm, slit width: Ex 5 nm; Em 5 nm. Inset: changes of fluorescence intensity at  $\lambda_{\text{max}}$  of **4** with molar concentration of *(R)*-**6**.

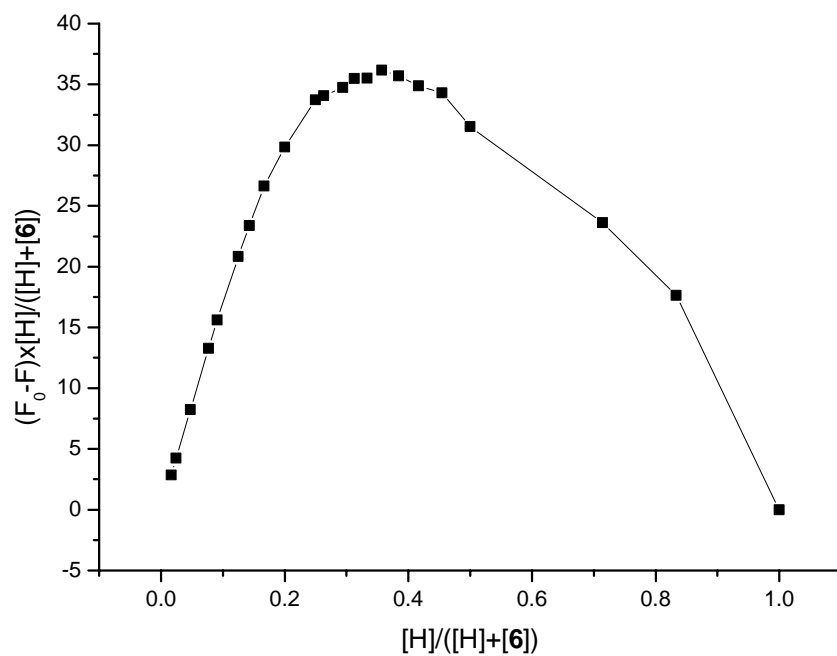

**Figure S23.** Job plot for fluorescence titration of **4** with *R*-**6**.

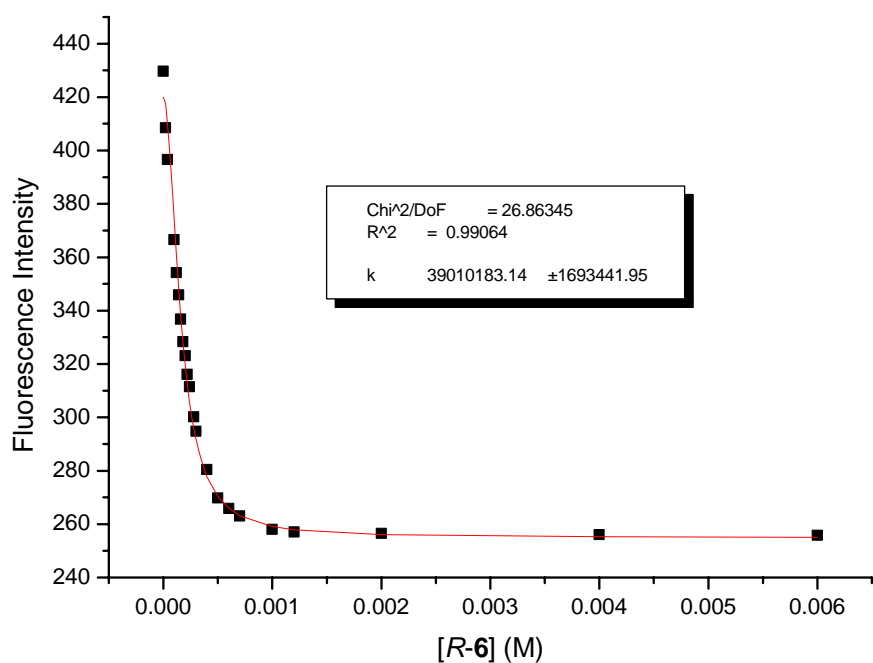

**Figure S24.** Determination of association constant by nonlinear fitting in Origin 6.1. The black squares are values by measurement and the red curve is one by fitting.

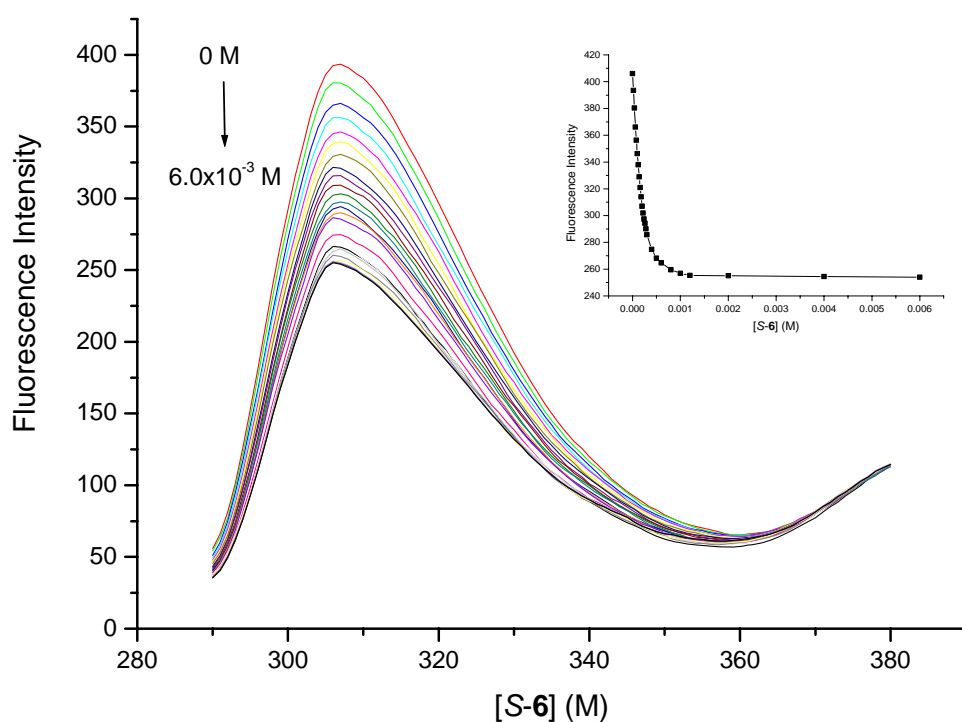

**Figure S25.** Emission spectra of **4** ( $1.0 \times 10^{-4}$  M) on addition of (*S*)-**6** ( $0$ – $6.0 \times 10^{-3}$  M) in ethanol,  $\lambda_{\text{ex}} = 280$  nm, slit width: Ex 5 nm; Em 5 nm. Inset: changes of fluorescence intensity at  $\lambda_{\text{max}}$  of **4** with molar concentration of (*S*)-**6**.

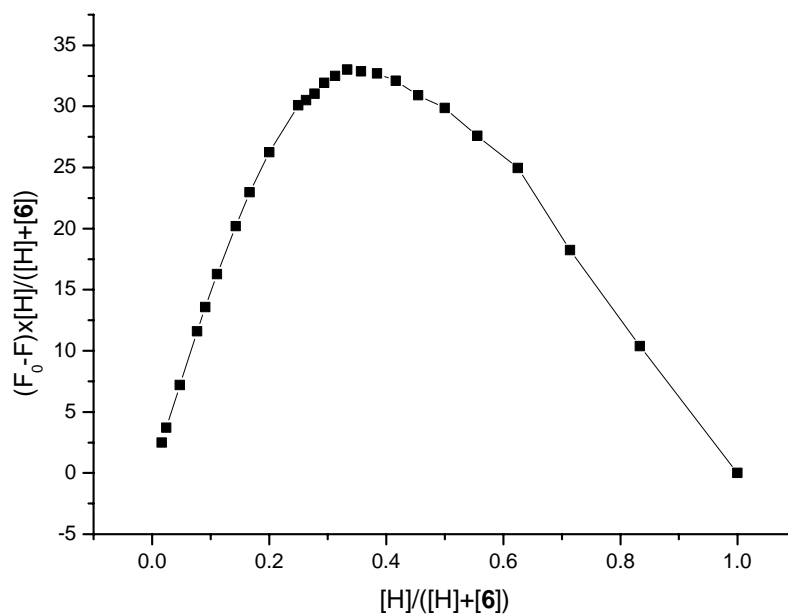

**Figure S26.** Job plot for fluorescence titration of 4 with S-6.

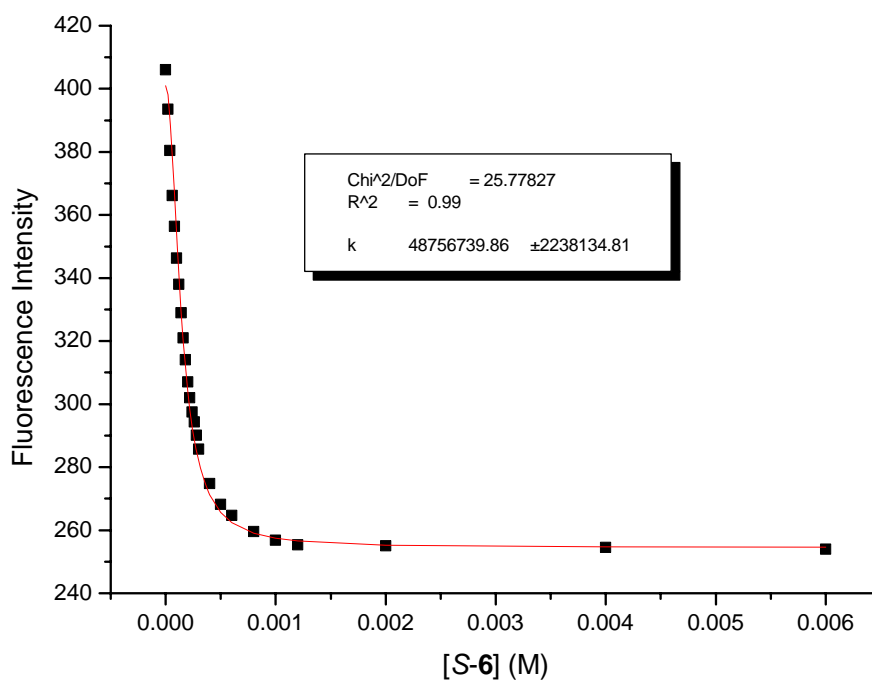

**Figure S27.** Determination of association constant by nonlinear fitting in Origin 6.1. The black squares are values by measurement and the red curve is one by fitting.

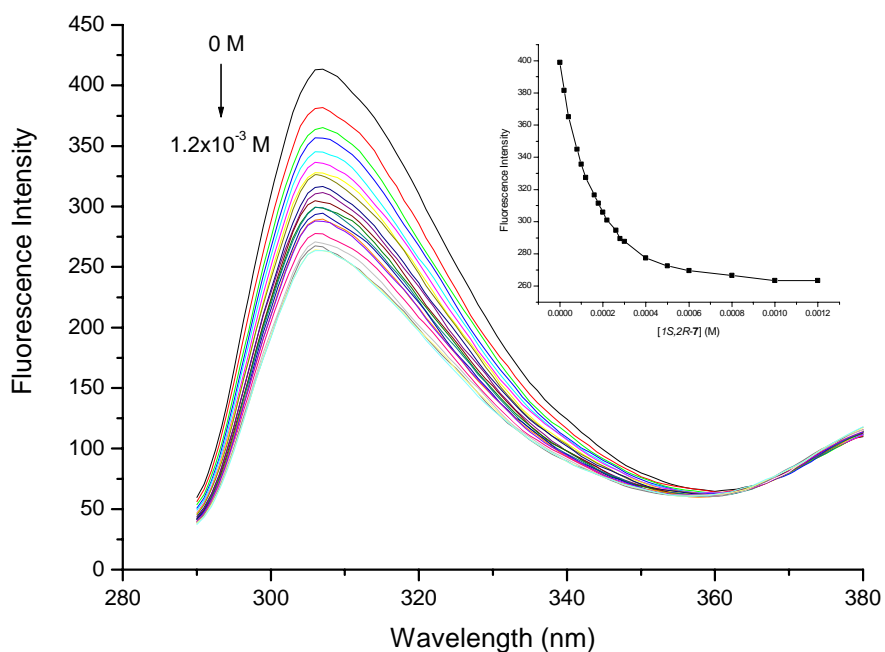

**Figure S28.** Emission spectra of **4** ( $1.0 \times 10^{-4}$  M) on addition of  $(1S,2R)$ -**7** ( $0$ – $1.2 \times 10^{-3}$  M) in ethanol,  $\lambda_{\text{ex}} = 280$  nm, slit width: Ex 5 nm; Em 5 nm. Inset: changes of fluorescence intensity at  $\lambda_{\text{max}}$  of **4** with molar concentration of  $(1S,2R)$ -**7**.

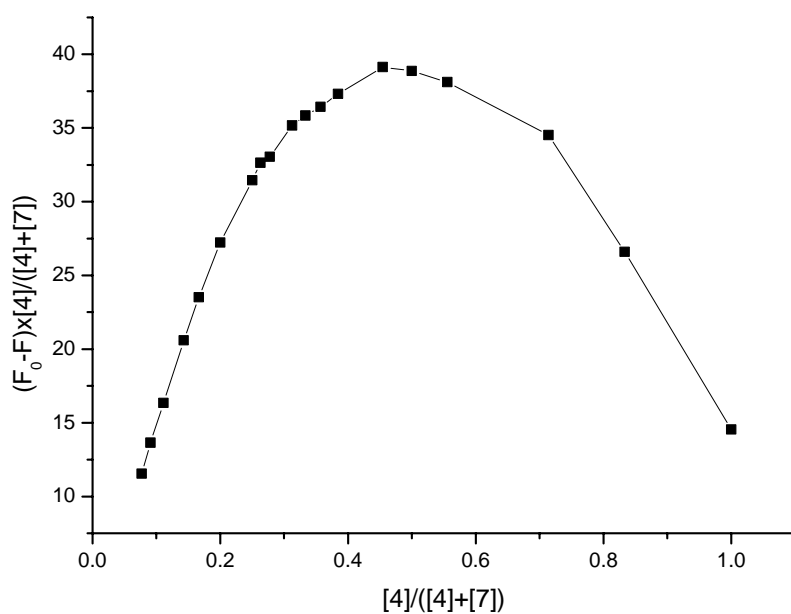

**Figure S29.** Job plot for fluorescence titration of **4** with  $(1S,2R)$ -**7**.

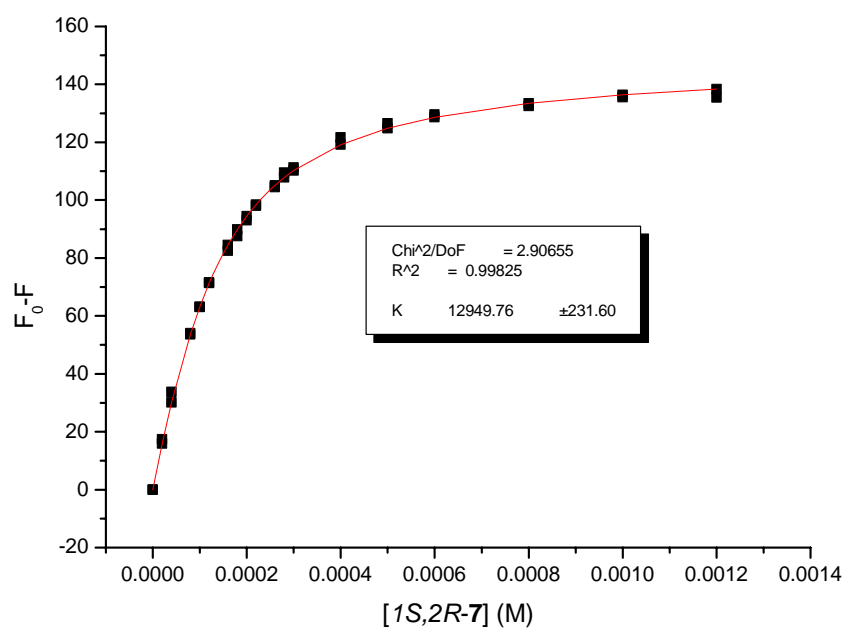

**Figure S30.** Determination of association constant by nonlinear fitting in Origin 6.1. The black squares are values by measurement and the red curve is one by fitting.

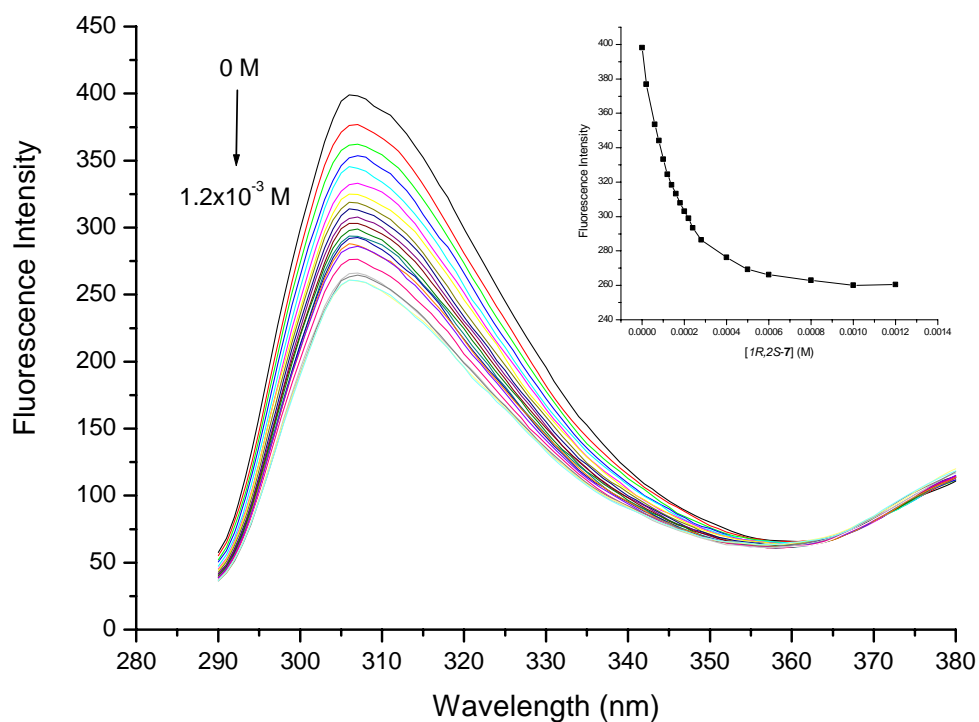

**Figure S31.** Emission spectra of **4** ( $1.0 \times 10^{-4}$  M) on addition of (*1R,2S*)-**7** ( $0$ – $1.2 \times 10^{-3}$  M) in ethanol,  $\lambda_{\text{ex}} = 280$  nm, slit width: Ex 5 nm; Em 5 nm. Inset: changes of fluorescence intensity at  $\lambda_{\text{max}}$  of **4** with molar concentration of (*1R,2S*)-**7**.

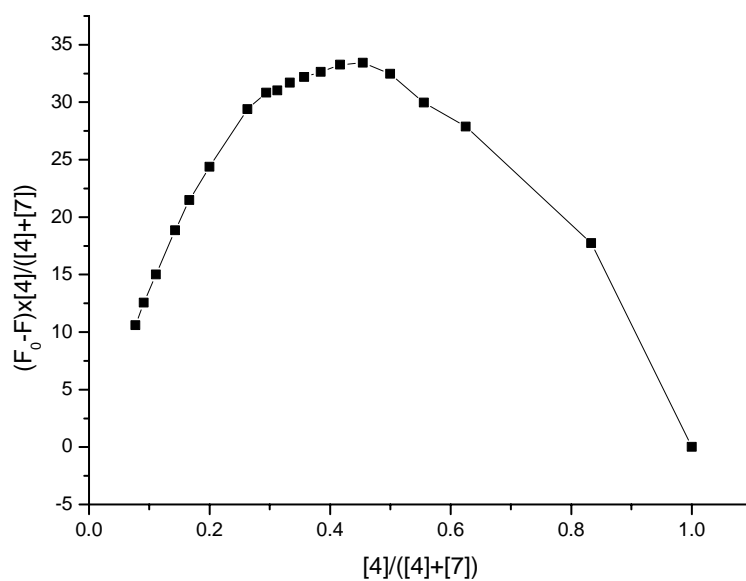

**Figure S32.** Job plot for fluorescence titration of **4** with (1R,2S)-7.

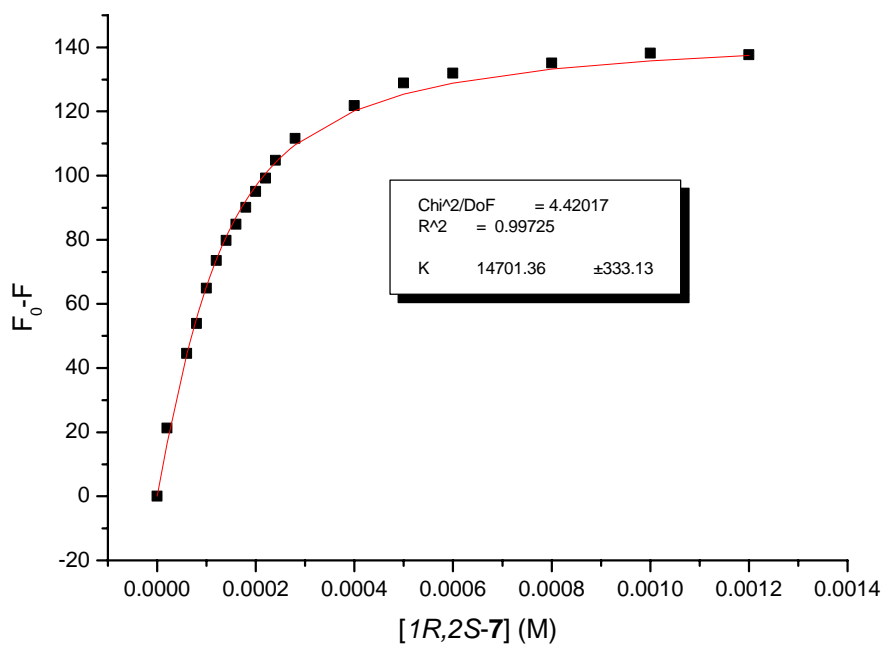

**Figure S33.** Determination of association constant by nonlinear fitting in Origin 6.1. The black squares are values by measurement and the red curve is one by fitting.



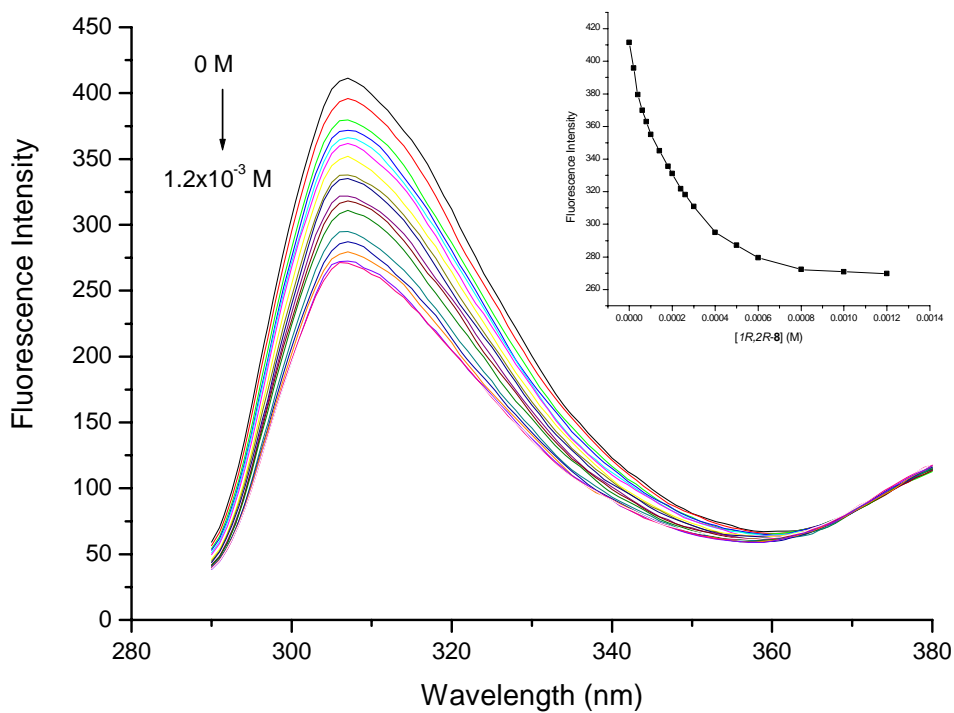

**Figure S34.** Emission spectra of **4** ( $1.0 \times 10^{-4}$  M) on addition of (*1R,2R*)-**8** ( $0$ – $1.2 \times 10^{-3}$  M) in ethanol,  $\lambda_{\text{ex}} = 280$  nm, slit width: Ex 5 nm; Em 5 nm. Inset: changes of fluorescence intensity at  $\lambda_{\text{max}}$  of **4** with molar concentration of (*1R,2R*)-**8**.

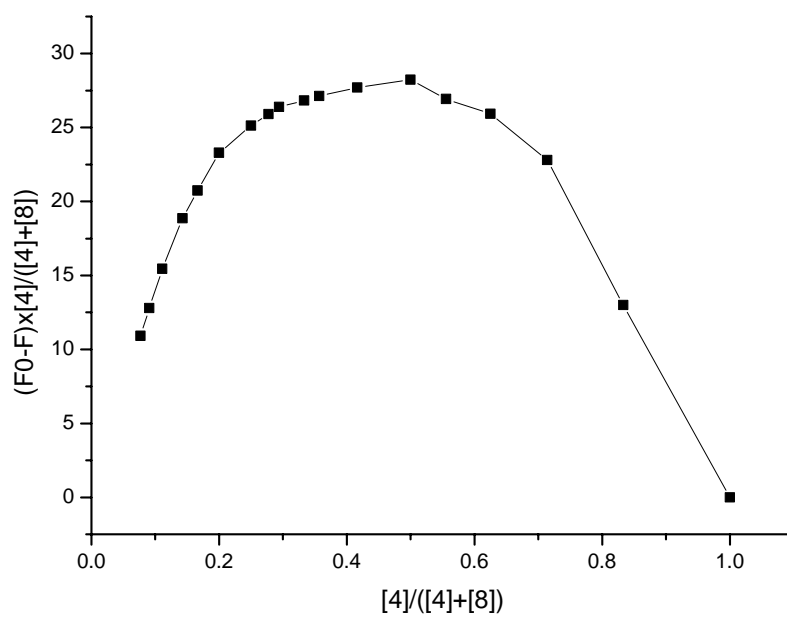

**Figure S35.** Job plot for fluorescence titration of **4** with (*1R,2R*)-**8**.

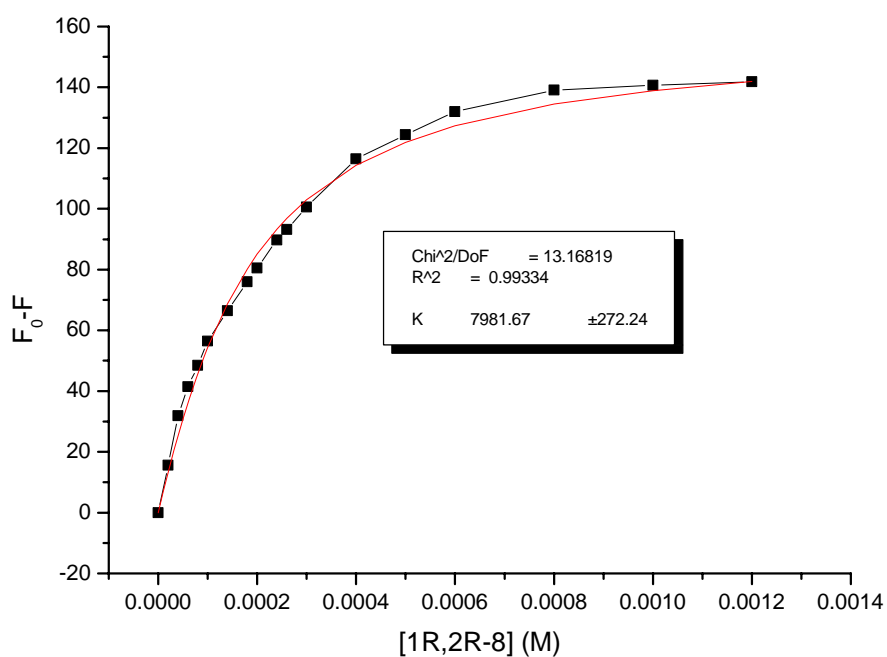

**Figure S36.** Determination of association constant by nonlinear fitting in Origin 6.1. The black squares are values by measurement and the red curve is one by fitting.

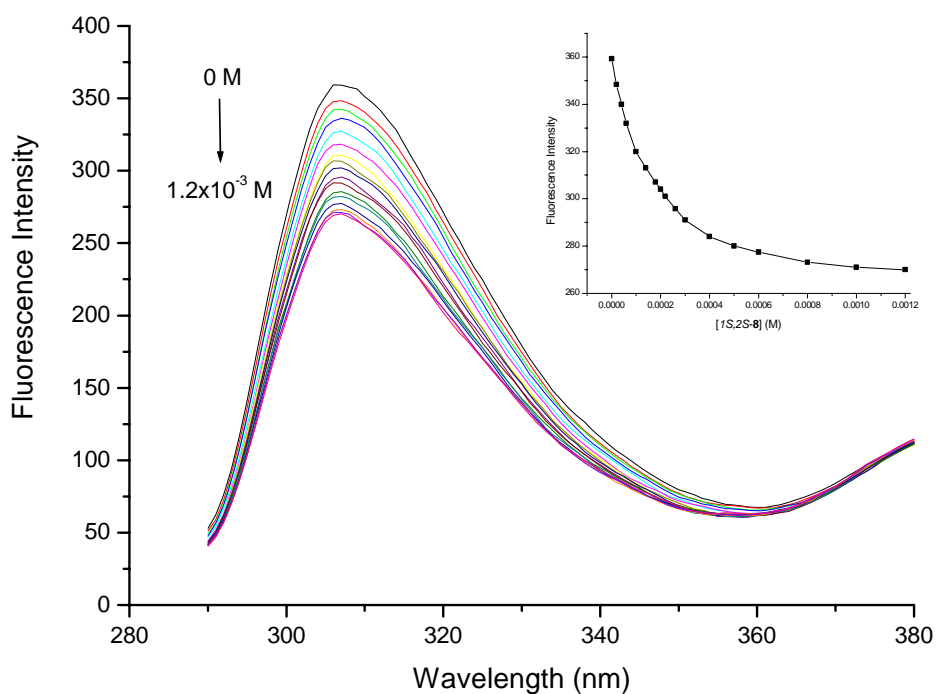

**Figure S37.** Emission spectra of **4** ( $1.0 \times 10^{-4}$  M) on addition of (*1S,2S*)-**8** ( $0$ – $1.2 \times 10^{-3}$  M) in ethanol,  $\lambda_{\text{ex}} = 280$  nm, slit width: Ex 5 nm; Em 5 nm. Inset: changes of fluorescence intensity at  $\lambda_{\text{max}}$  of **4** with molar concentration of (*1S,2S*)-**8**.

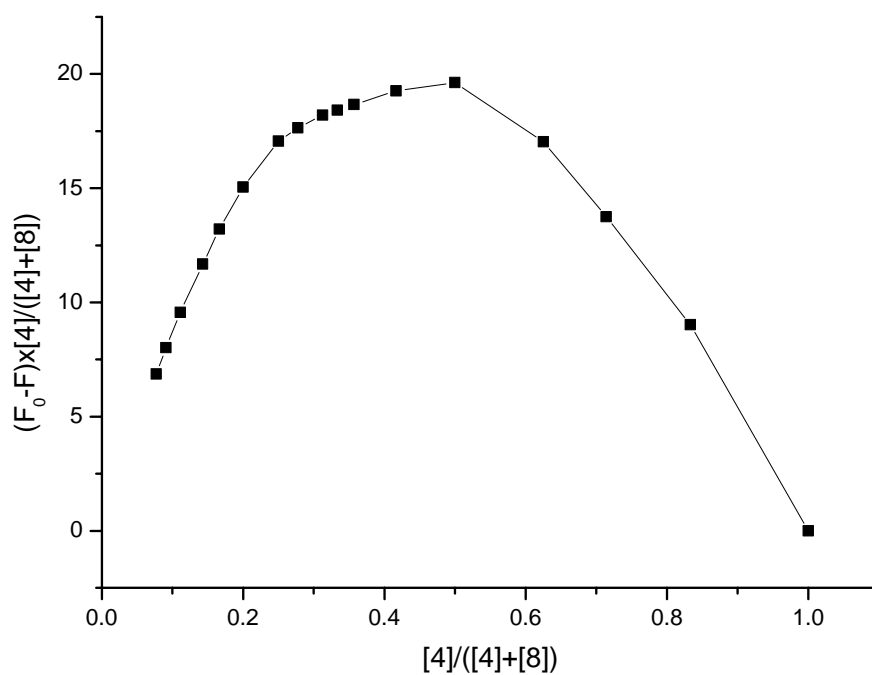

**Figure S38.** Job plot for fluorescence titration of 4 with (1S,2S)-8.

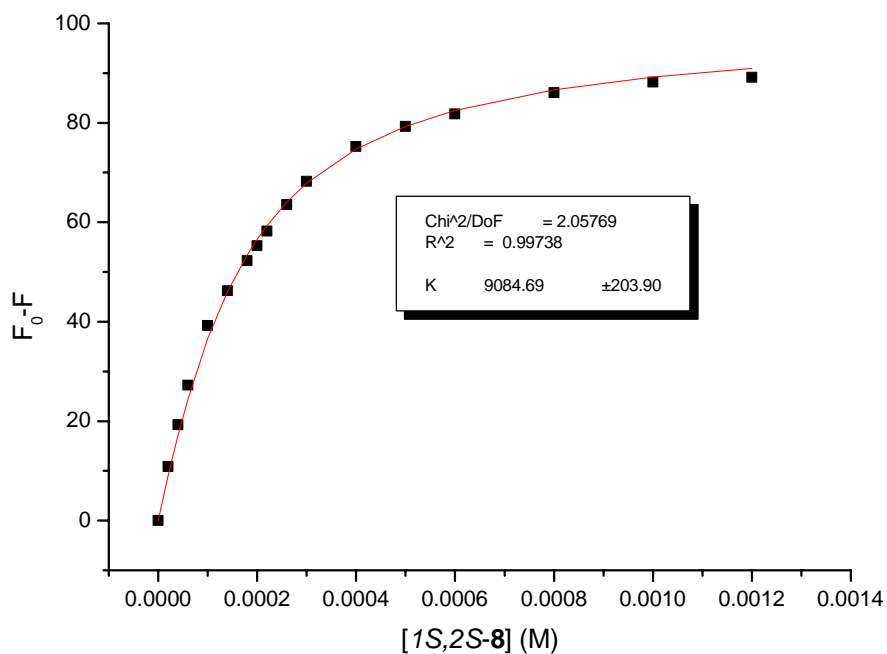

**Figure S39.** Determination of association constant by nonlinear fitting in Origin 6.1. The black squares are values by measurement and the red curve is one by fitting.
